# Supplementary material for: S100 Calcium Binding Protein Family Members Associate With Poor Patient Outcome and Response to Proteasome Inhibition in Multiple Myeloma
Source: Front Cell Dev Biol. 2021 Aug 16;9:723016. doi: 10.3389/fcell.2021.723016 (PMC8415228; doi:10.3389/fcell.2021.723016)
Supplement: Supplementary file 3 [file Table_2.XLSX]

## Sheet: Table S2
Supplementary Table S2. S100 gene copy number variation scores from MM patient samples in the FIMM dataset (n=168).
Sample ID	S100A1	S100A2	S100A3	S100A4	S100A5	S100A6	S100A7	S100A7A	S100A8	S100A9	S100A10	S100A11	S100A12	S100A13	S100A14	S100A16	TCHHL1	S100B	S100G	S100P	S100Z
1152_3	0.5028	0.5028	0.5028	0.5028	0.5028	0.5028	0.5028	0.5028	0.5028	0.5028	0.5028	0.5028	0.5028	0.5028	0.5028	0.5028	0.5028	-0.0435	-0.8759	-0.0874	-0.0524
1878_3	0.9623	0.9623	0.9623	0.9623	0.9623	0.9623	0.9623	0.9623	0.9623	0.9623	0.9623	0.9623	0.9623	0.9623	0.9623	0.9623	0.9623	-0.6653	-0.1866	0.2553	0.4098
1878_6	0.8093	0.8093	0.8093	0.8093	0.8093	0.8093	0.8093	0.8093	0.8093	0.8093	0.9869	0.9869	0.8093	0.8093	0.8093	0.8093	0.9869	-0.1413	-0.1757	-0.1171	0.3928
1913_3	0.894	0.894	0.894	0.894	0.894	0.894	0.1677	0.1677	0.1677	0.1677	0.1677	0.1677	0.1677	0.894	0.894	0.894	0.1677	-0.7322	-0.5352	-0.7488	0.1001
1926_3	0.2514	0.2514	0.2514	0.2514	0.2514	0.0612	0.0612	-0.129	-0.129	-0.129	-0.129	-0.129	-0.129	0.2514	0.2514	0.2514	-0.129	-0.1583	-0.1429	-0.8585	-0.1555
2662_3	-0.1937	-0.1937	-0.1937	-0.1937	-0.1937	-0.1937	-0.1937	-0.1937	-0.1937	-0.1937	-0.1937	-0.1937	-0.1937	-0.1937	-0.1937	-0.1937	-0.1937	-0.6647	-0.2083	-0.2958	0.262
2926_3	-0.1085	-0.1085	-0.1085	-0.1085	-0.1085	-0.1085	-0.1085	-0.1085	-0.1085	-0.1085	-0.1085	-0.1085	-0.1085	-0.1085	-0.1085	-0.1085	-0.1085	0.2966	-0.081	-0.0798	0.204
3792_3	500750	500750	500750	500750	500750	500750	500750	500750	500750	500750	500750	500750	500750	500750	500750	500750	500750	0.7587	-0.271	-0.3458	0.2116
3821_3	-0.0228	-0.0228	-0.0228	-0.0228	-0.0228	-0.0228	-0.0228	-0.0228	-0.0228	-0.0228	-0.0228	-0.0228	-0.0228	-0.0228	-0.0228	-0.0228	-0.0228	0.4198	-0.9277	-0.1392	0.3806
4136_3	0.9231	0.9231	0.9231	0.9231	0.9231	0.9231	0.9231	0.9231	0.9231	0.9231	0.9231	0.9231	0.9231	0.9231	0.9231	0.9231	0.9231	0.5306	-0.0505	-0.1019	-0.0654
4157_3	1.7377	1.7377	1.7377	1.7377	1.7377	1.7377	1.7377	0.998	0.998	0.998	1.7246	1.7246	0.998	1.7377	1.7377	1.7377	1.7377	-1.1154	-1.032	-0.0603	-0.1872
4263_3	-0.1571	-0.1571	-0.1571	-0.1571	-0.1571	-0.1571	-0.1571	-0.1571	-0.1571	-0.1571	-0.1571	-0.1571	-0.1571	-0.1571	-0.1571	-0.1571	-0.1571	0.3949	-1.1352	-0.2629	0.3097
4314_3	-0.1386	-0.1386	-0.1386	-0.1386	-0.1386	-0.1386	-0.1386	-0.1386	-0.1386	-0.1386	-0.1386	-0.1386	-0.1386	-0.1386	-0.1386	-0.1386	-0.1386	-0.1801	-0.02	-0.1637	0.3621
4709_3	0.0339	0.0339	0.0339	0.0339	0.0339	0.0339	0.0339	0.0339	0.0339	0.0339	0.375	-0.01905	0.0339	0.0339	0.0339	0.0339	-0.4131	-0.6367	-0.1461	-0.1127	-0.0998
4774_3	0.5016	0.5016	0.5016	0.5016	0.5016	0.5016	0.5016	0.5016	0.5016	0.5016	0.5016	0.5016	0.5016	0.5016	0.5016	0.5016	0.5016	-0.1307	-0.0611	0.0814	-0.1354
4783_3	-0.009	-0.009	-0.009	-0.009	-0.009	-0.009	-0.009	-0.009	-0.009	-0.009	-0.009	-0.009	-0.009	-0.009	-0.009	-0.009	-0.009	0.0061	-0.002	-0.0049	-0.0316
4787_3	0.47	0.47	0.47	0.47	0.47	0.47	0.47	0.47	0.47	0.47	0.47	0.47	0.47	0.47	0.47	0.47	0.47	-0.36345	-0.2676	-0.2659	0.2396
4839_3	0.0006	0.0006	0.0006	0.0006	0.0006	0.0006	0.0006	0.0006	0.0006	0.0006	0.0006	0.0006	0.0006	0.0006	0.0006	0.0006	0.0006	-0.0353	-0.0212	-0.0949	0.0038
4865_3	-0.1486	-0.1486	-0.1486	-0.1486	-0.1486	-0.1486	-0.1486	-0.1486	-0.1486	-0.1486	-0.1486	-0.1486	-0.1486	-0.1486	-0.1486	-0.1486	-0.1486	0.2913	-0.1556	-0.2107	0.2489
4981_3	0.3058	0.3058	0.3058	0.3058	0.3058	0.3058	0.3058	0.3058	0.3058	0.3058	0.3058	0.3058	0.3058	0.3058	0.3058	0.3058	0.3058	0.0195	-0.395	-0.2531	-0.1447
4990_3	-0.0547	-0.0547	-0.0547	-0.0547	-0.0547	-0.0547	-0.0547	-0.0547	-0.0547	-0.0547	-0.0547	-0.0547	-0.0547	-0.0547	-0.0547	-0.0547	-0.0547	0.2917	-0.0745	-0.102	-0.0816
5153_3	-0.0736	-0.0736	-0.0736	-0.0736	-0.0736	-0.0736	-0.0736	-0.0736	-0.0736	-0.0736	-0.0736	-0.0736	-0.0736	-0.0736	-0.0736	-0.0736	-0.0736	-0.0911	-0.8223	-0.1209	-0.1428
5154_3	0.4949	0.4949	0.4949	0.4949	0.4949	0.4949	0.4949	0.4949	0.4949	0.4949	0.4949	0.4949	0.4949	0.4949	0.4949	0.4949	0.4949	-0.031	-0.1091	-1.03	-0.0673
5163_3	0.9744	0.9744	0.9744	0.9744	0.9744	0.9744	0.9744	0.9744	0.9744	0.9744	0.9744	0.9744	0.9744	0.9744	0.9744	0.9744	0.9744	-0.0254	-0.0172	0.0076	0.008
5207_3	0.0227	0.0227	0.0227	0.0227	0.0227	0.0227	0.0227	0.0227	0.0227	0.0227	0.0227	0.0227	0.0227	0.0227	0.0227	0.0227	0.0227	-0.0005	-0.9046	-0.0155	-0.0318
5260_3	1.241	1.241	1.241	1.241	1.241	1.241	1.241	1.241	1.241	1.241	1.241	1.241	1.241	1.241	1.241	1.241	1.241	-0.0585	-0.0641	-0.0991	-0.0898
5260_6	1.0444	1.0444	1.0444	1.0444	1.0444	1.0444	1.0444	1.0444	1.0444	1.0444	1.0444	1.0444	1.0444	1.0444	1.0444	1.0444	1.0444	-0.0446	-0.1568	-0.1582	-0.1797
5758_3	-0.1225	-0.1225	-0.1225	-0.1225	-0.1225	-0.1225	-0.1225	-0.1225	-0.1225	-0.1225	-0.1225	-0.1225	-0.1225	-0.1225	-0.1225	-0.1225	-0.1225	0.4574	-0.1448	-0.1368	0.2975
5758_7	-0.069	-0.069	-0.069	-0.069	-0.069	-0.069	-0.069	-0.069	-0.069	-0.069	-0.069	-0.069	-0.069	-0.069	-0.069	-0.069	-0.069	-0.16885	-0.0677	-0.1403	-0.0798
587_3	-0.0196	-0.0196	-0.0196	-0.0196	-0.0196	-0.0196	-0.0196	-0.0196	-0.0196	-0.0196	-0.0196	-0.0196	-0.0196	-0.0196	-0.0196	-0.0196	-0.0196	-0.6008	-0.0317	-0.012	-0.0433
6211_3	-0.0736	-0.0736	-0.0736	-0.0736	-0.0736	-0.0736	-0.0736	-0.0736	-0.0736	-0.0736	-0.0736	-0.0736	-0.0736	-0.0736	-0.0736	-0.0736	-0.0736
6238_3	0.1043	0.1043	0.1043	0.1043	0.1043	0.1043	0.1043	0.1043	0.1043	0.1043	0.1043	0.1043	0.1043	0.1043	0.1043	0.1043	0.1043			0.1371	-0.0089
6243_3	-0.0691	-0.0691	-0.0691	-0.0691	-0.0691	-0.0691	-0.0691	-0.0691	-0.0691	-0.0691	-0.0177	-0.0177	-0.0691	-0.0691	-0.0691	-0.0691	-0.0177	0.0691	-0.0668	-0.1194	0.0282
6261_6	0.5088	0.5088	0.5088	0.5088	0.5088	0.5088	0.5088	0.5088	0.5088	0.5088	0.5088	0.5088	0.5088	0.5088	0.5088	0.5088	0.5088	0.5572	-0.2051	-0.2013	-0.138
6348_3	0.4444	0.4444	0.4444	0.4444	0.4444	0.4444	0.4444	0.4444	0.4444	0.4444	0.4444	0.4444	0.4444	0.4444	0.4444	0.4444	0.4444	0.4428	-0.0676	-0.1058	-0.0863
6350_3	0.6433	0.6433	0.6433	0.6433	0.6433	0.6433	0.6433	0.6433	0.6433	0.6433	0.6433	0.6433	0.6433	0.6433	0.6433	0.6433	0.6433	0.3499	-0.8987	0.0715	0.081
6351_3	-0.0829	-0.0829	-0.0829	-0.0829	-0.0829	-0.0829	-0.0829	-0.0829	-0.0829	-0.0829	-0.0829	-0.0829	-0.0829	-0.0829	-0.0829	-0.0829	-0.0829	-0.1297	-0.132	-0.086	0.1844
6362_3	0.04	0.04	0.04	0.04	0.04	0.04	0.04	0.04	0.04	0.04	0.04	0.04	0.04	0.04	0.04	0.04	0.04	-0.0045	-0.5142	-0.0487	-0.026
6368_3	-0.0113	-0.0113	-0.0113	-0.0113	-0.0113	-0.0113	-0.0113	-0.0113	-0.0113	-0.0113	-0.0113	-0.0113	-0.0113	-0.0113	-0.0113	-0.0113	-0.0113	0.095	-0.0254	-0.0283	-0.0366
6369_3	0.0135	0.0135	0.0135	0.0135	0.0135	0.0135	0.0135	0.0135	0.0135	0.0135	0.0135	0.0135	0.0135	0.0135	0.0135	0.0135	0.0135	0.0255	-0.7793	-0.0742	-0.0487
6385_3	0.5022	0.5022	0.5022	0.5022	0.5022	0.5022	0.5022	0.5022	0.5022	0.5022	0.5022	0.5022	0.5022	0.5022	0.5022	0.5022	0.5022	-0.0835	-0.1019	0.4806	-0.1013
6425_3	-0.0079	-0.0079	-0.0079	-0.0079	-0.0079	-0.0079	-0.0079	-0.0079	-0.0079	-0.0079	-0.0079	-0.0079	-0.0079	-0.0079	-0.0079	-0.0079	-0.0079	-0.0398	-0.6813	-0.0258	-0.0234
6463_3	0.0324	0.0324	0.0324	0.0324	0.0324	0.0324	0.0324	0.0324	0.0324	0.0324	0.0324	0.0324	0.0324	0.0324	0.0324	0.0324	0.0324	0.072	-0.0311	-0.023	-0.0272
6544_3	915665	915665	915665	915665	915665	915665	915665	0.6468	0.6468	0.6468	836043	836043	0.6468	915665	915665	915665	0.6468	-0.4107	0.1435	-0.8369	-0.3826
6566_3	0.0425	0.0425	0.0425	0.0425	0.0425	0.0425	0.0425	0.0425	0.0425	0.0425	0.0425	0.0425	0.0425	0.0425	0.0425	0.0425	0.0425	-0.0093	-0.0908	-0.0707	-0.0444
6568_3	-0.038	-0.038	-0.038	-0.038	-0.038	-0.038	-0.038	-0.038	-0.038	-0.038	-0.038	-0.038	-0.038	-0.038	-0.038	-0.038	-0.038	-0.0289	-0.1259	-0.1421	-0.19
6606_3	0.3484	0.3484	0.3484	0.3484	0.3484	0.11495	0.11495	-0.1185	-0.1185	-0.1185	1.1331	1.1331	-0.1185	0.3484	0.3484	0.3484	1.1331	-0.6617	-0.1758	-0.2075	-0.1447
6668_3	0.372	0.372	0.372	0.372	0.04165	-0.2887	-0.2887	-0.2887	-0.2887	-0.2887	0.0382	-0.2887	-0.2887	0.372	0.372	0.372	-0.2887	0.0116	0.2072	-0.1178	-0.2809
6861_3	0.398	0.398	0.398	0.398	0.398	0.398	0.398	0.398	0.398	0.398	0.398	0.398	0.398	0.398	0.398	0.398	0.398	0.0203	0.0251	-0.4392	-0.0654
6931_3	-0.1217	-0.1217	-0.1217	-0.1217	-0.1217	-0.1217	-0.1217	-0.1217	-0.1217	-0.1217	-0.1217	-0.1217	-0.1217	-0.1217	-0.1217	-0.1217	-0.1217	0.1599	-0.1462	-0.1142	-0.1464
6948_3	0.0397	0.0397	0.0397	0.0397	0.0397	0.0397	0.0397	0.0397	0.0397	0.0397	0.0397	0.0397	0.0397	0.0397	0.0397	0.0397	0.0397	-0.7002	-0.0106	-0.0041	-0.1013
7171_3	0.7563	0.7563	0.7563	0.7563	0.7563	0.7563	0.7563	0.7563	0.7563	0.1302	0.1302	0.1302	0.7563	0.7563	0.7563	0.7563	0.1302	-0.7739	-0.2872	0.3274	-0.4066
7276_3	0.4078	0.4078	0.4078	0.4078	0.4078	0.4078	0.1105	-0.1868	-0.1868	-0.1868	0.1051	-0.1868	-0.1868	0.4078	0.4078	0.4078	-0.1868	-0.4549	-0.1092	-0.3147	-0.2605
7281_3	0.4317	0.4317	0.4317	0.4317	0.4317	0.1762	0.1762	-0.0793	-0.0793	-0.0793	-0.0793	-0.0793	-0.0793	0.4317	0.4317	0.4317	-0.0793	-1.0499	-0.3065	0.1441	-0.0637
733_3	0.9533	0.9533	0.9533	0.9533	0.9533	0.9533	0.9533	0.9533	0.9533	0.9533	0.9533	0.9533	0.9533	0.9533	0.9533	0.9533	0.9533	-0.19905	0.0215	-0.0407	-0.0818
7396_3	-0.1211	-0.1211	-0.1211	-0.1211	-0.1211	-0.1211	-0.1211	-0.1211	-0.1211	-0.1211	-0.1211	-0.1211	-0.1211	-0.1211	-0.1211	-0.1211	-0.1211	-0.1125	-0.1085	0.1905	-0.1433
828_6	-0.0011	-0.0011	-0.0011	-0.0011	-0.0011	-0.0011	-0.0011	-0.0011	-0.0011	-0.0011	-0.0011	-0.0011	-0.0011	-0.0011	-0.0011	-0.0011	-0.0011	0.0023	-0.0715	-0.0856	-0.0956
8408_3	0.299	0.299	0.299	0.299	0.07245	0.07245	-0.1541	-0.1541	-0.1541	-0.1541	-0.1541	-0.1541	-0.1541	0.299	0.299	0.299	-0.1541	-0.7151	-0.1201	-0.073	-0.2584
905_3	-0.0031	-0.0031	-0.0031	-0.0031	-0.0031	-0.0031	-0.0031	-0.0031	-0.0031	-0.0031	-0.0031	-0.0031	-0.0031	-0.0031	-0.0031	-0.0031	-0.0031	0.05	-0.0754	-0.0835	-0.0672
1044_6	0.3683	0.3683	0.3683	0.3683	0.3683	0.3683	0.3683	0.3683	0.3683	0.3683	0.3683	0.3683	0.3683	0.3683	0.3683	0.3683	0.3683	0.7699	-0.2186	-0.1886	0.3503
1047_4	0.0264	0.0264	0.0264	0.0264	0.0264	0.0264	0.0264	0.0264	0.0264	0.0264	0.0264	0.0264	0.0264	0.0264	0.0264	0.0264	0.0264	-0.2778	-0.048	-0.0567	-0.0607
1151_3	0.0078	0.0078	0.0078	0.0078	0.0078	0.0078	0.0078	0.0078	0.0078	0.0078	0.0078	0.0078	0.0078	0.0078	0.0078	0.0078	0.0078	-0.0286	0.0486	0.0015	-0.0925
1193_3	0.5349	0.5349	0.5349	0.5349	0.5349	0.5349	0.5349	0.5349	0.5349	0.5349	0.5349	0.5349	0.5349	0.5349	0.5349	0.5349	0.5349	-0.1453	-0.2127	-0.2722	0.0967
1193_6	0.1254	0.1254	0.1254	0.1254	0.1254	0.1254	0.1254	0.1254	0.1254	0.1254	0.1254	0.1254	0.1254	0.1254	0.1254	0.1254	0.1254	0.0514	-0.1855	-0.1366	0.0176
1238_7	-0.079	-0.079	-0.079	-0.079	-0.079	-0.079	-0.079	-0.079	-0.079	-0.079	-0.0975	-0.0975	-0.079	-0.079	-0.079	-0.079	-0.0975	0.2078	-0.0048	0.0546	0.0287
1354_3	-0.0563	-0.0563	-0.0563	-0.0563	-0.0563	-0.0563	-0.0563	-0.0563	-0.0563	-0.0563	-0.0563	-0.0563	-0.0563	-0.0563	-0.0563	-0.0563	-0.0563	-0.033	-0.1972	0.1626	0.0338
1354_7	-0.0397	-0.0397	-0.0397	-0.0397	-0.0397	-0.0397	-0.0397	-0.0397	-0.0397	-0.0397	-0.1366	-0.1366	-0.0397	-0.0397	-0.0397	-0.0397	-0.1366	-0.0407	-0.3739	-0.0792	0.2626
1380_2	0.5123	0.5123	0.5123	0.5123	0.5123	0.5123	0.5123	0.5123	0.5123	0.5123	0.5123	0.5123	0.5123	0.5123	0.5123	0.5123	0.5123	-0.0828	-0.0249	-0.1161	-0.1065
1380_5	0.1707	0.1707	0.1707	0.1707	0.1707	0.1707	0.1707	0.1707	0.1707	0.1707	0.1707	0.1707	0.1707	0.1707	0.1707	0.1707	0.1707	-0.0054	-0.0159	-0.0801	0.0806
1380_11	0.0351	0.0351	0.0351	0.0351	0.0351	0.0351	0.0351	0.0351	0.0351	0.0351	0.0351	0.0351	0.0351	0.0351	0.0351	0.0351	0.0351	0.0182	-0.0879	-0.0593	-0.0697
1380_8	0.0289	0.0289	0.0289	0.0289	0.0289	0.0289	0.0289	0.0289	0.0289	0.0289	0.0289	0.0289	0.0289	0.0289	0.0289	0.0289	0.0289	-0.0092	-0.0506	0.0063	-0.0052
156_3	0.4555	0.4555	0.4555	0.4555	0.4555	0.4555	0.4555	0.4555	0.4555	0.4555	0.4555	0.4555	0.4555	0.4555	0.4555	0.4555	0.4555	0.041	-0.6249	-0.0443	0.0416
1579_10	-0.0248	-0.0248	-0.0248	-0.0248	-0.0248	-0.0248	-0.0248	-0.0248	-0.0248	-0.0248	-0.0248	-0.0248	-0.0248	-0.0248	-0.0248	-0.0248	-0.0248	0.0792	-0.0778	-0.0739	-0.0102
1579_3	0.0068	0.0068	0.0068	0.0068	0.0068	0.0068	0.0068	0.0068	0.0068	0.0068	0.0068	0.0068	0.0068	0.0068	0.0068	0.0068	0.0068	0.3668	-0.4204	-0.1504	-0.016
1862_3	0.5168	0.5168	0.5168	0.5168	0.5168	0.5168	0.5168	0.5168	0.5168	0.5168	0.5168	0.5168	0.5168	0.5168	0.5168	0.5168	0.5168	0.2428	-0.0354	0.0564	-0.1076
1910_6	0.8763	0.8763	0.8763	0.8763	0.8763	0.8763	0.8763	0.8763	0.8763	0.8763	0.8763	0.8763	0.8763	0.8763	0.8763	0.8763	0.8763	0.1094	-0.34755	-0.0332	-0.0706
1994_3	-0.0051	-0.0051	-0.0051	-0.0051	-0.0051	-0.0051	-0.0051	-0.0051	-0.0051	-0.0051	-0.0051	-0.0051	-0.0051	-0.0051	-0.0051	-0.0051	-0.0051	0.02	-0.0655	-0.0688	-0.0369
2097_3	0.0502	0.0502	0.0502	0.0502	0.0502	0.0502	0.0502	0.0502	0.0502	0.0502	0.0502	0.0502	0.0502	0.0502	0.0502	0.0502	0.0502	0.4237	-0.0068	-0.0264	-0.0833
2143_1	-0.025	-0.025	-0.025	-0.025	-0.025	-0.025	-0.025	-0.025	-0.025	-0.025	-0.025	-0.025	-0.025	-0.025	-0.025	-0.025	-0.025	-0.2619	-0.1173	-0.1854	0.2774
2235_2	0.5102	0.5102	0.5102	0.5102	0.5102	0.5102	0.5102	0.5102	0.5102	0.5102	0.5102	0.5102	0.5102	0.5102	0.5102	0.5102	0.5102	-0.0287	-0.849	-0.0175	-0.0082
2235_6	0.508	0.508	0.508	0.508	0.508	0.508	0.508	0.508	0.508	0.508	0.4	0.4	0.508	0.508	0.508	0.508	0.4	0.0373	-0.5675	-0.0153	0.3683
2249_2	0.1442	0.1442	0.1442	0.1442	0.1442	0.1442	0.1442	0.1442	0.1442	0.1442	0.1442	0.1442	0.1442	0.1442	0.1442	0.1442	0.1442	0.0022	-0.4511	-0.0436	0.005
2306_3	-0.1312	-0.1312	-0.1312	-0.1312	-0.1312	-0.1312	-0.1312	-0.1312	-0.1312	-0.1312	-0.1312	-0.1312	-0.1312	-0.1312	-0.1312	-0.1312	-0.1312	0.2297	-0.1388	-0.0367	0.0194
2383_3	0.0144	0.0144	0.0144	0.0144	0.0144	0.0144	0.0144	0.0144	0.0144	0.0144	0.0144	0.0144	0.0144	0.0144	0.0144	0.0144	0.0144	-0.0629	-0.0118	0.0505	0.0223
2383_7	0.0144	0.0144	0.0144	0.0144	0.0144	0.0144	0.0144	0.0144	0.0144	0.0144	0.0144	0.0144	0.0144	0.0144	0.0144	0.0144	0.0144	-0.0629	-0.0118	0.0505	0.0223
2518_3	-0.1206	-0.1206	-0.1206	-0.1206	-0.1206	-0.1206	-0.1206	-0.1206	-0.1206	-0.1206	-0.1206	-0.1206	-0.1206	-0.1206	-0.1206	-0.1206	-0.1206	0.7746	-0.1334	-0.9158	0.3283
2549_6	0.3579	0.3579	0.3579	0.3579	0.3579	0.3579	0.3579	0.3579	0.3579	0.3579	0.332	0.332	0.3579	0.3579	0.3579	0.3579	0.332	0.5843	-0.151	-0.1485	0.4845
2549_3	0.0925	0.0925	0.0925	0.0925	0.0925	0.0925	0.0925	0.0925	0.0925	0.0925	0.0925	0.0925	0.0925	0.0925	0.0925	0.0925	0.0925	0.3976	-0.1368	-0.1335	0.2144
2684_3	0.503	0.503	0.503	0.503	0.503	0.503	0.503	0.503	0.503	0.503	0.503	0.503	0.503	0.503	0.503	0.503	0.503	0.0631	0.012	-0.0059	0.0091
2700_5	0.9277	0.9277	0.9277	0.9277	0.9277	0.9277	0.9277	0.9277	0.9277	0.9277	0.9493	0.9493	0.9277	0.9277	0.9277	0.9277	0.9493	0.1829	0.075	0.0274	0.0407
2700_2	1.1809	1.1809	1.1809	1.1809	1.1809	1.1809	1.1809	1.1809	1.1809	1.1809	1.0958	1.0958	1.1809	1.1809	1.1809	1.1809	1.0958	-0.0746	0.0457	-0.0901	-0.0794
2757_3	0.8771	0.8771	0.8771	0.8771	0.8771	0.8771	0.8771	0.8771	0.8771	0.8771	0.8771	0.8771	0.8771	0.8771	0.8771	0.8771	0.8771	-0.056	-0.0557	-0.0548	-0.0898
2757_6	0.2823	0.2823	0.2823	0.2823	0.2823	0.2823	0.2823	0.2823	0.2823	0.2823	0.2823	0.2823	0.2823	0.2823	0.2823	0.2823	0.2823	-0.7061	-0.0619	-0.1463	0.023
2777_2	-0.0835	-0.0835	-0.0835	-0.0835	-0.0835	-0.0835	-0.0835	-0.0835	-0.0835	-0.0835	-0.1085	-0.1085	-0.0835	-0.0835	-0.0835	-0.0835	-0.1085	0.3271	-0.8402	-0.2432	0.5862
2855_2	0.861	0.861	0.861	0.861	0.861	0.861	0.861	0.861	0.861	0.861	0.861	0.861	0.861	0.861	0.861	0.861	0.861	0.0488	-0.8458	-0.141	-0.0781
2979_6	0.5773	0.5773	0.5773	0.5773	0.5773	0.5773	0.5773	0.5773	0.5773	0.5773	0.5773	0.5773	0.5773	0.5773	0.5773	0.5773	0.5773	0.2461	-1.0603	-0.2599	0.2105
2979_2	0.5158	0.5158	0.5158	0.5158	0.5158	0.5158	0.5158	0.5158	0.5158	0.5158	0.5158	0.5158	0.5158	0.5158	0.5158	0.5158	0.5158	0.1264	-1.0951	-0.3524	0.045
3001_9	-0.0798	-0.0798	-0.0798	-0.0798	-0.0798	-0.0798	-0.0798	-0.0798	-0.0798	-0.0798	-0.0798	-0.0798	-0.0798	-0.0798	-0.0798	-0.0798	-0.0798	0.4212	-0.1818	-0.2286	0.3525
3001_12	0.0977	0.0977	0.0977	0.0977	0.0977	0.0977	0.0977	0.0977	0.0977	0.0977	0.0977	0.0977	0.0977	0.0977	0.0977	0.0977	0.0977	0.4249	-0.2264	-0.1745	0.0727
3001_18	0.6209	0.6209	0.6209	0.6209	0.6209	0.6209	0.6209	0.6209	0.6209	0.6209	0.6209	0.6209	0.6209	0.6209	0.6209	0.6209	0.6209	0.5243	-0.1262	-0.088	-0.0516
3001_6	-0.032	-0.032	-0.032	-0.032	-0.032	-0.032	-0.032	-0.032	-0.032	-0.032	-0.032	-0.032	-0.032	-0.032	-0.032	-0.032	-0.032	0.0614	-0.0543	-0.1156	-0.0569
3001_3	-0.0064	-0.0064	-0.0064	-0.0064	-0.0064	-0.0064	-0.0064	-0.0064	-0.0064	-0.0064	-0.0064	-0.0064	-0.0064	-0.0064	-0.0064	-0.0064	-0.0064	0.4526	-0.0492	-0.0559	-0.014
3001_15	0.0654	0.0654	0.0654	0.0654	0.0654	0.0654	0.0654	0.0654	0.0654	0.0654	0.0654	0.0654	0.0654	0.0654	0.0654	0.0654	0.0654	0.5021	-0.1366	-0.0811	-0.0345
3129_5	0.0854	0.0854	0.0854	0.0854	0.0854	0.0854	0.0854	0.0854	0.0854	0.0854	0.0854	0.0854	0.0854	0.0854	0.0854	0.0854	0.0854	0.3175	-0.5304	1001862	-0.306
3129_2	0.0731	0.0731	0.0731	0.0731	0.0731	0.0731	0.0731	0.0731	0.0731	0.0731	0.0731	0.0731	0.0731	0.0731	0.0731	0.0731	0.0731	0.0888	0.0248	0.7624	-0.1123
3177_3	0.5386	0.5386	0.5386	0.5386	0.5386	0.5386	0.5386	0.5386	0.5386	0.5386	0.5386	0.5386	0.5386	0.5386	0.5386	0.5386	0.5386	0.0534	-1.0108	-0.0659	-0.0529
3214_7	0.4151	0.4151	0.4151	0.4151	0.4151	0.4151	0.4151	0.4151	0.4151	0.4151	0.4151	0.4151	0.4151	0.4151	0.4151	0.4151	0.4151	0.1333	-0.1265	-0.0089	-0.1357
3481_3	0.0876	0.0876	0.0876	0.0876	0.0876	0.0876	0.0876	0.0876	0.0876	0.0876	0.0876	0.0876	0.0876	0.0876	0.0876	0.0876	0.0876	-0.0605	-0.0938	0.0857	-0.2889
3497_3	0.0042	0.0042	0.0042	0.0042	0.0042	0.0042	0.0042	0.0042	0.0042	0.0042	0.0042	0.0042	0.0042	0.0042	0.0042	0.0042	0.0042	0.4914	-0.0066	-0.0444	-0.0198
3514_3	-0.0722	-0.0722	-0.0722	-0.0722	-0.0722	-0.0722	-0.0722	-0.0722	-0.0722	-0.0722	-0.0722	-0.0722	-0.0722	-0.0722	-0.0722	-0.0722	-0.0722	-0.0132	-0.2256	-1.0411	0.232
3586_3	0.5944	0.5944	0.5944	0.5944	0.5944	0.5944	0.5944	0.5944	0.5944	0.5944	0.5944	0.5944	0.5944	0.5944	0.5944	0.5944	0.5944	0.9681	-0.0325	-0.7058	-0.0654
3595_3	0.1976	0.1976	0.1976	0.1976	0.1976	0.1976	0.1976	0.1976	0.1976	0.1976	0.1976	0.1976	0.1976	0.1976	0.1976	0.1976	0.1976	0.0217	-0.0872	-0.1092	-0.065
3647_3	-0.2727	-0.2727	-0.2727	-0.2727	-0.2727	-0.2727	-0.2727	-0.2727	-0.2727	-0.2727	-0.2727	-0.2727	-0.2727	-0.2727	-0.2727	-0.2727	-0.2727	0.6324	-0.3477	-0.3379	-0.0112
3704_6	-0.0408	-0.0408	-0.0408	-0.0408	-0.0408	-0.0408	-0.0408	-0.0408	-0.0408	-0.0408	-0.0408	-0.0408	-0.0408	-0.0408	-0.0408	-0.0408	-0.0408	0.0209	-0.4277	-0.4979	-0.2202
3704_3	0.0175	0.0175	0.0175	0.0175	0.0175	0.0175	0.0175	0.0175	0.0175	0.0175	0.0175	0.0175	0.0175	0.0175	0.0175	0.0175	0.0175	0.0413	-0.6509	-0.0449	-0.0157
3717_3	-0.0961	-0.0961	-0.0961	-0.0961	-0.0961	-0.0961	-0.0961	-0.0961	-0.0961	-0.0961	-0.0961	-0.0961	-0.0961	-0.0961	-0.0961	-0.0961	-0.0961	0.2174	-0.1364	-0.1699	0.1396
3767_3	-0.1286	-0.1286	-0.1286	-0.1286	-0.1286	-0.1286	-0.1286	-0.1286	-0.1286	-0.1286	-0.1286	-0.1286	-0.1286	-0.1286	-0.1286	-0.1286	-0.1286	-0.1168	-0.1337	-0.1679	0.1852
3800_3	-0.2565	-0.2565	-0.2565	-0.2565	-0.2565	-0.2565	-0.2565	-0.2565	-0.2565	-0.2565	-0.2565	-0.2565	-0.2565	-0.2565	-0.2565	-0.2565	-0.2565	0.2671	-0.2494	-0.3076	0.1927
3886_3	0.014	0.014	0.014	0.014	0.014	0.014	0.014	0.014	0.014	0.014	0.014	0.014	0.014	0.014	0.014	0.014	0.014	-0.0003	-0.5632	-0.0297	-0.0659
3901_3	-0.0604	-0.0604	-0.0604	-0.0604	-0.0604	-0.0604	-0.0604	-0.0604	-0.0604	-0.0604	-0.0604	-0.0604	-0.0604	-0.0604	-0.0604	-0.0604	-0.0604	-0.0573	-0.1276	-0.1393	0.3051
3906_3	-0.0634	-0.0634	-0.0634	-0.0634	-0.0634	-0.0634	-0.0634	-0.0634	-0.0634	-0.0634	-0.0634	-0.0634	-0.0634	-0.0634	-0.0634	-0.0634	-0.0634	-0.04	-0.2233	-0.0684	-0.072
3966_3	0.686	0.686	0.686	0.686	0.686	0.686	0.686	0.686	0.686	0.686	0.686	0.686	0.686	0.686	0.686	0.686	0.686	0.1628	-1.5062	0.1157	-0.1914
4011_3	0.0414	0.0414	0.0414	0.0414	0.0414	0.0414	0.0414	0.0414	0.0414	0.0414	0.0414	0.0414	0.0414	0.0414	0.0414	0.0414	0.0414	-0.0193	0.0246	-0.0817	-0.1099
4011_6	0.0235	0.0235	0.0235	0.0235	0.0235	0.0235	0.0235	0.0235	0.0235	0.0235	0.0235	0.0235	0.0235	0.0235	0.0235	0.0235	0.0235	0.0124	-0.061	-0.0819	-0.0397
4035_3	0.0663	0.0663	0.0663	0.0663	0.0663	0.0663	0.0663	0.0663	0.0663	0.0663	0.0663	0.0663	0.0663	0.0663	0.0663	0.0663	0.0663	0.3981	-0.0756	-0.1274	0.3454
4296_6	0.0256	0.0256	0.0256	0.0256	0.0256	0.0256	0.0256	0.0256	0.0256	0.0256	0.0256	0.0256	0.0256	0.0256	0.0256	0.0256	0.0256	-0.0209	-0.031	-0.0461	-0.0274
4296_3	0.0038	0.0038	0.0038	0.0038	0.0038	0.0038	0.0038	0.0038	0.0038	0.0038	0.0038	0.0038	0.0038	0.0038	0.0038	0.0038	0.0038	-0.22925	-0.0153	-0.052	-0.0235
4317_3	-0.063	-0.063	-0.063	-0.063	-0.063	-0.063	-0.063	-0.063	-0.063	-0.063	-0.063	-0.063	-0.063	-0.063	-0.063	-0.063	-0.063	0.202	-0.0127	-0.0704	0.2631
4317_11	0.0024	0.0024	0.0024	0.0024	0.0024	0.0024	0.0024	0.0024	0.0024	0.0024	0.0024	0.0024	0.0024	0.0024	0.0024	0.0024	0.0024	0.0032	-0.0488	-0.0533	-0.059
4317_7	-0.0151	-0.0151	-0.0151	-0.0151	-0.0151	-0.0151	-0.0151	-0.0151	-0.0151	-0.0151	-0.0151	-0.0151	-0.0151	-0.0151	-0.0151	-0.0151	-0.0151	0.0889	-0.0639	-0.0008	-0.0679
4346_3	0.0929	0.0929	0.0929	0.0929	0.0929	0.0929	0.0929	0.0929	0.0929	0.0929	0.0929	0.0929	0.0929	0.0929	0.0929	0.0929	0.0929	0.0484	0.0086	-0.0988	-0.1408
4349_3	0.3335	0.3335	0.3335	0.3335	0.3335	0.3335	0.3335	0.3335	0.3335	0.3335	0.3335	0.3335	0.3335	0.3335	0.3335	0.3335	0.3335	-0.0177	-0.0442	-0.0618	-0.078
4350_3	0.0258	0.0258	0.0258	0.0258	0.0258	0.0258	0.0258	0.0258	0.0258	0.0258	0.0258	0.0258	0.0258	0.0258	0.0258	0.0258	0.0258	0.0063	-0.2	0.0136	-0.011
4365_3	0.0065	0.0065	0.0065	0.0065	0.0065	0.0065	0.0065	0.0065	0.0065	0.0065	0.0065	0.0065	0.0065	0.0065	0.0065	0.0065	0.0065	0.0035	0.3595	-0.1188	-0.1051
4369_3	0.0523	0.0523	0.0523	0.0523	0.0523	0.0523	0.0523	0.0523	0.0523	0.0523	0.0523	0.0523	0.0523	0.0523	0.0523	0.0523	0.0523	0.003	-0.0243	-0.0394	-0.1422
4398_3	0.718	0.718	0.718	0.718	0.718	0.718	0.718	0.718	0.718	0.718	0.7212	0.7212	0.718	0.718	0.718	0.718	0.7212	0.1887	-0.1242	-0.067	0.2523
4596_3	0.003	0.003	0.003	0.003	0.003	0.003	0.003	0.003	0.003	0.003	0.003	0.003	0.003	0.003	0.003	0.003	0.003	0.1184	-0.0064	-0.0273	-0.1218
4637_3	0.2632	0.2632	0.2632	0.2632	0.2632	0.2632	0.2632	0.2632	0.2632	0.2632	0.2632	0.2632	0.2632	0.2632	0.2632	0.2632	0.2632	-0.0808	-0.1101	-0.1047	0.2178
4691_3	-0.0661	-0.0661	-0.0661	-0.0661	-0.0661	-0.0661	-0.0661	-0.0661	-0.0661	-0.0661	-0.0661	-0.0661	-0.0661	-0.0661	-0.0661	-0.0661	-0.0661	-0.6561	-0.9346	-0.1131	0.368
4692_3	0.4542	0.4542	0.4542	0.4542	0.4542	0.4542	0.4542	0.4542	0.4542	0.4542	0.4542	0.4542	0.4542	0.4542	0.4542	0.4542	0.4542	0.1054	-0.0068	-0.018	-0.1235
4705_3	0.0042	0.0042	0.0042	0.0042	0.0042	0.0042	0.0042	0.0042	0.0042	0.0042	0.0042	0.0042	0.0042	0.0042	0.0042	0.0042	0.0042	-0.2843	0.0061	-0.0339	-0.0289
572_6	-0.1165	-0.1165	-0.1165	-0.1165	-0.1165	-0.1165	-0.1165	-0.1165	-0.1165	-0.1165	-0.1165	-0.1165	-0.1165	-0.1165	-0.1165	-0.1165	-0.1165	0.3412	-0.2484	-0.1424	0.2746
572_9	-0.1275	-0.1275	-0.1275	-0.1275	-0.1275	-0.1275	-0.1275	-0.1275	-0.1275	-0.1275	-0.1275	-0.1275	-0.1275	-0.1275	-0.1275	-0.1275	-0.1275	0.3625	-0.1867	-0.1853	0.2698
572_3	0.3971	0.1486	-0.0999	-0.0999	-0.0999	-0.0999	-0.0999	-0.0999	-0.0999	-0.0999	-0.0999	-0.0999	-0.0999	0.3971	0.3971	0.3971	-0.0999	0.2985	-0.149	-0.1779	0.222
584_3	0.8041	0.8041	0.8041	0.8041	0.8041	0.8041	0.8041	0.8041	0.8041	0.8041	0.8041	0.8041	0.8041	0.8041	0.8041	0.8041	0.8041	-0.1899	-0.308	-0.0989	0.113
656_4	0.5373	0.5373	0.5373	0.5373	0.5373	0.5373	0.5373	0.5373	0.5373	0.5373	0.5373	0.5373	0.5373	0.5373	0.5373	0.5373	0.5373	0.1014	0.032	-0.7536	-0.0119
810_3	0.4829	0.4829	0.4829	0.4829	0.4829	0.4829	0.4829	0.4829	0.4829	0.4829	0.4829	0.4829	0.4829	0.4829	0.4829	0.4829	0.4829	-0.0404	0.0032	-0.0638	-0.1097
840_3	-0.0519	-0.0519	-0.0519	-0.0519	-0.0519	-0.0519	-0.0519	-0.0519	-0.0519	-0.0519	-0.0519	-0.0519	-0.0519	-0.0519	-0.0519	-0.0519	-0.0519	0.1082	-0.0659	-0.0459	0.1553
861_3	-0.0295	-0.0295	-0.0295	-0.0295	-0.0295	-0.0295	-0.0295	-0.0295	-0.0295	-0.0295	-0.0295	-0.0295	-0.0295	-0.0295	-0.0295	-0.0295	-0.0295	0.5076	-0.0648	-0.1235	0.2058
882_3	0.5505	0.5505	0.5505	0.5505	0.5505	0.5505	0.5505	0.5505	0.5505	0.5505	0.5505	0.5505	0.5505	0.5505	0.5505	0.5505	0.5505	0.0111	-0.8303	-0.149	-0.1202
896_5	0.5312	0.5312	0.5312	0.5312	0.5312	0.5312	0.5312	0.5312	0.5312	0.5312	0.5312	0.5312	0.5312	0.5312	0.5312	0.5312	0.5312	0.0012	-0.0168	-0.0419	-0.028
899_12	0.2926	0.2926	0.2926	0.2926	0.2926	0.2926	0.2926	0.2926	0.2926	0.2926	0.319	0.319	0.2926	0.2926	0.2926	0.2926	0.319	-0.0902	-0.0743	0.1448	-0.0873
899_3	0.4227	0.4227	0.4227	0.4227	0.4227	0.4227	0.4227	0.4227	0.4227	0.4227	0.4518	0.4518	0.4227	0.4227	0.4227	0.4227	0.4518	0.0131	-0.1049	0.3027	-0.1482
899_9	0.695	0.695	0.695	0.695	0.695	0.695	0.695	0.695	0.695	0.695	0.695	0.695	0.695	0.695	0.695	0.695	0.695	0.0083	-0.4159	0.5107	-0.5559
899_6	0.3611	0.3611	0.3611	0.3611	0.3611	0.3611	0.3611	0.3611	0.3611	0.3611	0.3611	0.3611	0.3611	0.3611	0.3611	0.3611	0.3611	-0.0508	-0.1512	0.3409	-0.2132
908_3	0.2859	0.2859	0.2859	0.2859	0.2859	0.2859	0.2859	0.2859	0.2859	0.2859	0.2859	0.2859	0.2859	0.2859	0.2859	0.2859	0.2859	0.337	-0.1164	-0.1775	-0.1014
911_2	0.464	0.464	0.464	0.464	0.464	0.464	0.464	0.464	0.464	0.464	0.464	0.464	0.464	0.464	0.464	0.464	0.464	0.382	-0.9751	-0.1565	0.3532
911_8	0.8203	0.8203	0.8203	0.8203	0.8203	0.8203	0.8203	0.8203	0.8203	0.8203	0.8203	0.8203	0.8203	0.8203	0.8203	0.8203	0.8203	0.3951	-1.0935	-0.3415	-0.2302
911_5	0.3296	0.3296	0.3296	0.3296	0.3296	0.3296	0.3296	0.3296	0.3296	0.3296	0.3296	0.3296	0.3296	0.3296	0.3296	0.3296	0.3296	0.3731	-0.904	-0.1914	0.2884
920_2	-0.1171	-0.1171	-0.1171	-0.1171	-0.1171	-0.1171	-0.1171	-0.1171	-0.1171	-0.1171	-0.1171	-0.1171	-0.1171	-0.1171	-0.1171	-0.1171	-0.1171	0.4458	-0.1437	-0.1725	-0.1743
921_3	0.0101	0.0101	0.0101	0.0101	0.0101	0.0101	0.0101	0.0101	0.0101	0.0101	0.0101	0.0101	0.0101	0.0101	0.0101	0.0101	0.0101	0.0908	-0.8926	0.031	-0.1035
933_9	0.482	0.482	0.482	0.482	0.482	0.482	0.482	0.482	0.482	0.482	0.4609	0.4609	0.482	0.482	0.482	0.482	0.4609	0.2514	-0.1313	-0.0861	0.0265
933_6	0.492	0.492	0.492	0.492	0.492	0.492	0.492	0.492	0.492	0.492	0.4783	0.4783	0.492	0.492	0.492	0.492	0.4783	0.1989	-0.1418	-0.0924	0.0306
933_3	0.1805	0.1805	0.1805	0.1805	0.1805	0.1805	0.1805	0.1805	0.1805	0.1805	0.1805	0.1805	0.1805	0.1805	0.1805	0.1805	0.1805	-0.0318	-0.0301	-0.0233	-0.0259
938_6	-0.0947	-0.0947	-0.0947	-0.0947	-0.0947	-0.0947	-0.0947	-0.0947	-0.0947	-0.0947	-0.0947	-0.0947	-0.0947	-0.0947	-0.0947	-0.0947	-0.0947	-0.1022	-0.139	-0.1316	0.362
973_2	-0.1972	-0.1972	-0.1972	-0.1972	-0.1972	-0.1972	-0.1972	-0.1972	-0.1972	-0.1972	-0.1972	-0.1972	-0.1972	-0.1972	-0.1972	-0.1972	-0.1972	0.2076	-0.399	0.1591	0.2022
982_3	0.2339	0.2339	0.2339	0.2339	0.2339	0.2339	0.2339	0.2339	0.2339	0.2339	0.2799	0.2799	0.2339	0.2339	0.2339	0.2339	0.2799	-0.0479	-0.0821	0.0013	0.2864
982_6	0.3339	0.3339	0.3339	0.3339	0.3339	0.3339	0.3339	0.3339	0.3339	0.3339	0.2838	0.2838	0.3339	0.3339	0.3339	0.3339	0.2838	0.3928	-0.0739	0.1617	-0.2063
